# Supplementary material
Source: PubMed Central journal article supplement (PMC1315891)

**Identification of Gbp2p as a novel poly(A)<sup>+</sup>RNA binding protein  
in yeast involved in the cytoplasmic delivery of mRNAs**

Supplementary Material

Merle Windgassen & Heike Krebber

## Supplementary Material

**S. Fig. 1.** Gbp2p is a shuttling protein. Wildtype and *mtr10-7* strains expressing Gbp2p, the shuttling protein Npl3p or the nuclear protein Yrb2p as GFP fusions from the inducible *GAL1* promoter were grown in glucose containing selective medium to  $5 \times 10^6$  cells/ml before they were incubated in raffinose medium for 16 hours at 18°C to grow to a density of  $\sim 1 \times 10^7$  cells/ml. Synthesis of the fusion protein was then induced by adding galactose to the medium. After two hours the *GAL1* promoter was repressed for one hour by the addition of glucose. Finally cells were shifted to 37°C for one hour to induce the mutant phenotype of *mtr10-7*, thus resulting in a block of Mtr10p-dependent import. The subcellular localization of the GFP fusion proteins was determined by fluorescence microscopy.

**S. Fig. 2.** Mutant gbp2-S13A is mislocalized to the cytoplasm of a *sky1* null. Wildtype or *sky1::TRP1* strains expressing gbp2-S13A fused to GFP were grown to the logarithmic growth phase and the localization was determined by fluorescence microscopy.

**S. Fig. 1**

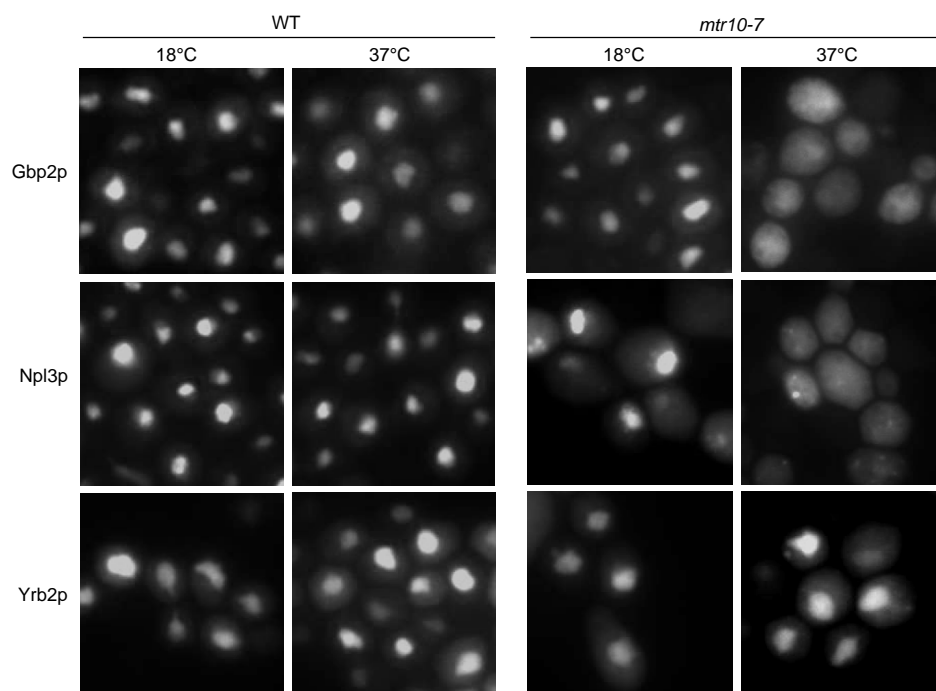

**S. Fig. 2.**

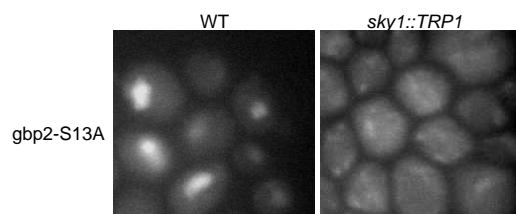

Supplement: 4-embor763-s1.pdf [file 4-embor763-s1.pdf]
